# Supplementary material for: The Origin of Teratogenic Retinoids in Cyanobacteria
Source: MDPI journal article supplement (doi:10.3390/toxins14090636), 2022-09-15
Supplement: s1 [file s1]

SUPPLEMENTARY INFORMATION TO PAPER:

## The origin of teratogenic retinoids in cyanobacteria

Authors: Luděk Sehnal, Marie Smutná, Lucie Bláhová, Pavel Babica, Petra Šplíchalová, Klára Hilscherová

**Table S1. ALDH - BLAST comparison.** Similarity comparison of cyanobacterial and human enzymes containing CD F1-2. Part A shows basic information about enzyme annotation and origin. Part B shows BLAST comparison of individual enzymes. Abbreviations: C – percentage (%) cover of compared sequences; E – E-value; S - percentage (%) similarity.

| <b><u>A</u></b> | <b>Accession number</b> | <b>Species</b>                | <b>Enzyme</b> | <b>Conserved Domain</b> |
|-----------------|-------------------------|-------------------------------|---------------|-------------------------|
| <b>ToB</b>      | WP_038075203.1          | <i>Tolypothrix_boutellei</i>  | ALDH          | F1-2                    |
| <b>CroCh</b>    | WP_008272605.1          | <i>Crocospaera_chwakensis</i> | ALDH          | F1-2                    |
| <b>H-A1</b>     | NP_000680.2             | <i>Homo_sapiens</i>           | ALDH A1       | F1-2                    |
| <b>H-A2</b>     | NP_003879.2             | <i>Homo_sapiens</i>           | ALDH A2       | F1-2                    |
| <b>H-2</b>      | NP_000681.2             | <i>Homo_sapiens</i>           | ALDH 2        | F1-2                    |

  

| <b><u>B</u></b> | <b>ToB</b>          | <b>CroCh</b>        | <b>H-A1</b>         | <b>H-A2</b>        | <b>H-2</b>          |
|-----------------|---------------------|---------------------|---------------------|--------------------|---------------------|
| <b>ToB</b>      |                     | C100%; E0.0; S82.7% | C98%; E0.0; S63.7%  | C97%; E0.0; S62.8% | C98%; E0.0; S67.4%  |
| <b>CroCh</b>    | C100%; E0.0; S82.7% |                     | C98%; E0.0; S64.8%  | C98%; E0.0; S63.7% | C98%; E0.0; S68.9%  |
| <b>H-A1</b>     | C98%; E0.0; S63.7%  | C98%; E0.0; S64.8%  |                     | C98%; E0.0; S73.2% | C100%; E0.0; S68.1% |
| <b>H-A2</b>     | C97%; E0.0; S62.8%  | C98%; E0.0; S63.7%  | C98%; E0.0; S73.2%  |                    | C96%; E0.0; S67.3%  |
| <b>H-2</b>      | C98%; E0.0; S67.4%  | C98%; E0.0; S68.9%  | C100%; E0.0; S68.1% | C96%; E0.0; S67.3% |                     |

**Table S2. Basic characteristics of analyzed cyanobacterial aldehyde dehydrogenases.** Only one example sequence of aldehyde dehydrogenase for each conserved domain is presented.

| Accession number | Organism                          | Enzyme                                                  | Conserved domain   | Product                                                       | Function                                                                                             |
|------------------|-----------------------------------|---------------------------------------------------------|--------------------|---------------------------------------------------------------|------------------------------------------------------------------------------------------------------|
| WP_042155384.1   | Planktothrix agardhii             | CoA-acylating methylmalonate-semialdehyde dehydrogenase | ALDH_F6_MMSDH      | propionyl-CoA                                                 | Amino acid metabolism - catabolism                                                                   |
| WP_067774485.1   | Nostoc sp. NIES 3756              | proline/L-glutamate gamma-semialdehyde dehydrogenase    | Pro_dh + ALDH_PutA | glutamate                                                     | two step catabolism of proline to glutamate                                                          |
| WP_067771050.1   | unclassified Nostoc               | aldehyde dehydrogenase family protein                   | CAJ73105           | uncharacterized                                               | -                                                                                                    |
| WP_067769491.1   | Nostoc sp. NIES 3756              | glutamate-5-semialdehyde dehydrogenase                  | ProA               | L-glutamate 5-semialdehyde and phosphate                      | L-proline biosynthesis                                                                               |
| WP_067769931.1   | Nostoc sp. NIES 3757              | aldehyde dehydrogenase family protein                   | F1-2               | retinoic acid; tetrahydrofolate and CO <sub>2</sub> ; acetate | oxidation of retinal; 10-formyltetrahydrofolate; acetaldehyde                                        |
| ARI84357.1       | Microcystis aeruginosa PCC 7806SL | NAD-dependent succinate-semialdehyde dehydrogenase      | ALDH_SSADH1_GabD1  | succinate                                                     | oxidation of succinate semialdehyde to succinate in the degradation of glutamate and 4-aminobutyrate |
| OBQ44124.1       | Aphanizomenon flos-aque WA102     | aldehyde dehydrogenase                                  | YwdH               | uncharacterized                                               | oxidation of both apocarotenals and alkanals into corresponding acids                                |
|                  |                                   | aldehyde dehydrogenase                                  | CALDH              | apocarotenoid acid >C <sub>25</sub>                           | oxidation of both apocarotenals and alkanals into corresponding acids                                |
| WP_096594581.1   | Calothrix sp. NIES 2098           | aldehyde dehydrogenase family protein                   | DDAldH             | 4,4'-diapolycopene-diacid                                     | 4,4'-diapolycopene-dialdehyde into 4,4'-diapolycopene-diacid                                         |

**Table S3. MS parameters for analyzed retinoid compounds;** MRM (multiple reaction monitoring); quantification ions marked (bold).

| Compound                   | MRM transition              | Cone voltage (V) | Collision energy (V) |
|----------------------------|-----------------------------|------------------|----------------------|
| 4OH-ATRA                   | <b>299.2</b> → <b>95.2</b>  | 30               | 23                   |
|                            | 299.2 → 157.2               | 30               | 25                   |
| 4keto-ATRA                 | <b>315.2</b> → <b>137.1</b> | 30               | 25                   |
|                            | 315.2 → 241.2               | 30               | 15                   |
| 4keto-RAL                  | <b>299.2</b> → <b>147.2</b> | 30               | 24                   |
|                            | 299.2 → 189.2               | 30               | 16                   |
| 5,6epoxy-ATRA              | <b>317.2</b> → <b>107.2</b> | 30               | 21                   |
|                            | 317.2 → 153.2               | 30               | 14                   |
| 9/13 <i>cis</i> -RA        | <b>301.2</b> → <b>159.1</b> | 30               | 23                   |
|                            | 301.2 → 205.1               | 30               | 13                   |
| ATRA                       | <b>301.2</b> → <b>159.1</b> | 30               | 23                   |
|                            | 301.2 → 205.1               | 30               | 13                   |
| RAL                        | <b>285.3</b> → <b>161.2</b> | 30               | 9                    |
|                            | 285.3 → 175.2               | 30               | 13                   |
| 4keto-13 <i>cis</i> -RA    | <b>315.3</b> → <b>137.1</b> | 30               | 25                   |
|                            | 315.3 → 241.2               | 30               | 15                   |
| 4keto-9 <i>cis</i> -RA     | <b>315.3</b> → <b>137.1</b> | 30               | 25                   |
|                            | 315.3 → 241.2               | 30               | 15                   |
| <hr/>                      |                             |                  |                      |
| ATRA-d5                    | <b>306.2</b> → <b>162.2</b> | 30               | 20                   |
|                            | 306.2 → 206.2               | 30               | 15                   |
| RAL-d5                     | <b>290.3</b> → <b>161.2</b> | 30               | 8                    |
|                            | 290.3 → 180.3               | 30               | 15                   |
| 4keto-ATRA-d3              | 290.3 → 198.2               | 30               | 7                    |
|                            | <b>318.2</b> → <b>137.2</b> | 30               | 24                   |
| 4keto-13 <i>cis</i> -RA-d3 | 318.2 → 162.2               | 30               | 14                   |
|                            | 318.2 → 244.2               | 30               | 14                   |
|                            | <b>321.2</b> → <b>143.1</b> | 30               | 25                   |
|                            | 321.2 → 247.2               | 30               | 15                   |

**Table S4. Primers and PCR.** Sequences of used primers and PCR conditions for Illumina library preparation.

|                         | Primer       |         | Sequence                                                          | Product size | Reference                                          |
|-------------------------|--------------|---------|-------------------------------------------------------------------|--------------|----------------------------------------------------|
| <b>V4 16S rRNA gene</b> | <b>16S_F</b> | forward | TCGTCGGCAGCGTCAGATGTGTATAAGAGACAG-InnerTag-GTGYCAGCMGCCGCGGTAA    | ~ 300        | <i>Caporaso et al., 2011; Apprill et al., 2015</i> |
|                         | <b>16S_R</b> | reverse | GTCTCGTGGGCTCGGAGATGTGTATAAGAGACAGC-InnerTag-GGACTACNVGGGTWTCTAAT |              |                                                    |

| <b>V4 16S rRNA gene</b>    |        |       |  |
|----------------------------|--------|-------|--|
| Thermal cycling conditions |        |       |  |
| Temperature                | Time   | cycle |  |
| 95°C                       | 30 s   |       |  |
| 98°C                       | 10 s   |       |  |
| 55°C                       | 15 s   | 30x   |  |
| 72°C                       | 30 s   |       |  |
| 72°C                       | 10 min |       |  |
| 10°C                       | 10 min |       |  |

## **References:**

- Apprill, A., McNally, S., Parsons, R., & Weber, L. (2015). Minor revision to V4 region SSU rRNA 806R gene primer greatly increases detection of SAR11 bacterioplankton. *Aquatic Microbial Ecology*, 75(2), 129–137. <https://doi.org/10.3354/ame01753>
- Caporaso, J. G., Lauber, C. L., Walters, W. A., Berg-Lyons, D., Lozupone, C. A., Turnbaugh, P. J., Fierer, N., & Knight, R. (2011). Global patterns of 16S rRNA diversity at a depth of millions of sequences per sample. *Proceedings of the National Academy of Sciences of the United States of America*, 108(SUPPL. 1), 4516–4522. <https://doi.org/10.1073/pnas.1000080107>

List of other Supplementary materials (attached MS Excel files)

**Supplementary material S1**

Excel sheet S1a: Retinoids concentration in cultures of axenic cyanobacteria

Excel sheet S1b: Taxonomic composition of cultures of axenic cyanobacteria based on 16S data

**Supplementary material S2**

Excel sheet: Cyanobacterial ALDHs - sequences

**Supplementary material S3**

Excel sheet: Cyanobacterial 16S rRNA - sequences

**Supplementary material S4**

Excel sheet: Exp 1 Data – Concentration, REQchem

**Supplementary material S5**

Excel sheet: Exp 2 Data – Concentration, REQchem

**Supplementary material S6**

Excel sheet: Optimization of Fenton reaction
